# Supplementary material for: Perinatal Outcomes and Level of Labour Difficulty in Deliveries with Right and Left Foetal Position—A Preliminary Study
Source: MDPI journal article supplement (doi:10.3390/healthcare12080864), 2024-04-22
Supplement: s1 [file s1]

Assessment of the level of labour difficulty form

|                                                                                                                                            |              |
|--------------------------------------------------------------------------------------------------------------------------------------------|--------------|
| <b>How do you assess the level of labour difficulty on the scale from 1 to 10, where 1 refers to minimal and 10 to maximal difficulty?</b> | <b>Score</b> |
| <b>Assessment by a woman (1-10)</b>                                                                                                        |              |
| <b>Assessment by a midwife (1-10)</b>                                                                                                      |              |
