# Supplementary material for: Perinatal Outcomes and Level of Labour Difficulty in Deliveries with Right and Left Foetal Position—A Preliminary Study
Source: MDPI journal article supplement (doi:10.3390/healthcare12080864), 2024-04-22
Supplement: s1 [file s1]

## Labour Observation form

|                       |  |                          |           |                       |    |       |
|-----------------------|--|--------------------------|-----------|-----------------------|----|-------|
| Start of observation: |  |                          | Initials: |                       | ID |       |
| age:                  |  | pregnancy:               |           | labour:               |    | week: |
| height:               |  | Weight before pregnancy: |           | Weight before labour: |    |       |

|                   |     |    |                    |  |
|-------------------|-----|----|--------------------|--|
| <b>induction:</b> | YES | NO | <b>Indication:</b> |  |
|-------------------|-----|----|--------------------|--|

| On the admission:  |                                                                                                                                                                |                                              |
|--------------------|----------------------------------------------------------------------------------------------------------------------------------------------------------------|----------------------------------------------|
|                    | USG                                                                                                                                                            | Leopold's manoeuvres:                        |
| Foetal positioning | <input type="checkbox"/> right <input type="checkbox"/> left <input type="checkbox"/> unable to determine                                                      | <input type="checkbox"/> right               |
|                    |                                                                                                                                                                | <input type="checkbox"/> left                |
| Placenta location  | <input type="checkbox"/> anterior <input type="checkbox"/> posteri <input type="checkbox"/> funda <input type="checkbox"/> right <input type="checkbox"/> left | <input type="checkbox"/> unable to determine |

[illegible]

# Labour Observation form

|                                                                 |  |  |  |  |  |  |  |  |  |  |  |  |
|-----------------------------------------------------------------|--|--|--|--|--|--|--|--|--|--|--|--|
| Progression of foetal head in relations to the interspinal line |  |  |  |  |  |  |  |  |  |  |  |  |
| epidural (+/- )                                                 |  |  |  |  |  |  |  |  |  |  |  |  |

| Pelvis assessment: |                                                                   |
|--------------------|-------------------------------------------------------------------|
|                    | <input type="checkbox"/> normal <input type="checkbox"/> abnormal |

## Assessment of uterine contractions: (more than one answer possible)

- ☐ PROM (no uterine contractions)
 ☐ primary hypotonic uterine contractions
- ☐ secondary uterine inertia
 ☐ primary hypertonic uterine contractions
- ☐ discoordination of uterine contractions
 ☐ contractions of normal strenght, but shorter
- ☐ normal uterine contractions
- ☐ normal uterine contractions after oxytocine
- ☐ normal uterine contractions after amiotomy
- ☐ normal uterine contractions after spontaneous rupture of the membranes

| How long was the uterine contractions (how many hours) |  |                  |  |                 |  |                                    |  |
|--------------------------------------------------------|--|------------------|--|-----------------|--|------------------------------------|--|
| irregular                                              |  | every 10 minutes |  | every 5 minutes |  | every 2-3 minutes or more frequent |  |

| Phases of labour (in minutes)           |  |                                             |  |
|-----------------------------------------|--|---------------------------------------------|--|
| Latent phase of the first stage (< 4cm) |  | First stage (from contractions every 5 min) |  |
| Second stage                            |  | Active pushing in the second stage          |  |

- ☐ Lack of progress in the first stage of labour (dilation)..... hours without progress.....
- ☐ Very slow progress

Lack of progress in the second stage of labour (more than 1 hours)

- ☐ yes, progression of the foetal head .....
- ☐ no

When the woman experiences the urge to push?

- ☐ no urge to push
- ☐ in the first stage of labour (dilation?) .....
- ☐ in the second stage of labour ( after how many minutes?) .....

|                                                  |
|--------------------------------------------------|
| If epidural was used, what were the indications? |
|--------------------------------------------------|

# Labour Observation form

|                                                                                                                                                                                                                                        |                                                                                                                                                                                                                                                                                                                                                                                                      |             |
|----------------------------------------------------------------------------------------------------------------------------------------------------------------------------------------------------------------------------------------|------------------------------------------------------------------------------------------------------------------------------------------------------------------------------------------------------------------------------------------------------------------------------------------------------------------------------------------------------------------------------------------------------|-------------|
| <input type="checkbox"/> woman's request as initially said in the birth plan                                                                                                                                                           |                                                                                                                                                                                                                                                                                                                                                                                                      |             |
| Woman's request because:<br><input type="checkbox"/> pain too intense <input type="checkbox"/> woman not feeling well psychologically<br><input type="checkbox"/> lack of progress <input type="checkbox"/> suggested by the personnel |                                                                                                                                                                                                                                                                                                                                                                                                      |             |
| Does epidural changes the engagement and the rotation of foetal head?                                                                                                                                                                  |                                                                                                                                                                                                                                                                                                                                                                                                      | YES      NO |
| Where the pain was mostly located                                                                                                                                                                                                      | <input type="checkbox"/> sacrum <input type="checkbox"/> back <input type="checkbox"/> thighs <input type="checkbox"/> lower abdomen<br><input type="checkbox"/> other.....                                                                                                                                                                                                                          |             |
| <b>Delivery:</b>                                                                                                                                                                                                                       | <input type="checkbox"/> vaginal <input type="checkbox"/> vacuum<br><input type="checkbox"/> forceps <input type="checkbox"/> CS                                                                                                                                                                                                                                                                     |             |
| <b>Indications for instrumental or surgical delivery:</b>                                                                                                                                                                              | <input type="checkbox"/> abnormal foetal heart pattern <input type="checkbox"/> lack of labour progress<br><input type="checkbox"/> prolonged second stage of labour <input type="checkbox"/> woman's exhaustion<br><input type="checkbox"/> lack of cooperation between woman and medical personnel<br><input type="checkbox"/> lack of personnel's patience<br><input type="checkbox"/> other..... |             |

| Birth:                                                  |  |        |  |                                                                                                                                                                                                                                                                                                                                                                                                               |  |     |
|---------------------------------------------------------|--|--------|--|---------------------------------------------------------------------------------------------------------------------------------------------------------------------------------------------------------------------------------------------------------------------------------------------------------------------------------------------------------------------------------------------------------------|--|-----|
| Sex                                                     |  | weight |  | Apgar score                                                                                                                                                                                                                                                                                                                                                                                                   |  | ICU |
| Does the external foetal head rotation was spontaneous? |  |        |  | YES                                                                                                                                                                                                                                                                                                                                                                                                           |  |     |
|                                                         |  |        |  | NO                                                                                                                                                                                                                                                                                                                                                                                                            |  |     |
| Assessment of perineal injury :                         |  |        |  | <input type="checkbox"/> First-degree tear <input type="checkbox"/> Second-degree tear <input type="checkbox"/> Third-degree tear<br><input type="checkbox"/> laceration of the vaginal wall<br><input type="checkbox"/> laceration of the vaginal mucosa<br><input type="checkbox"/> laceration of the periurethral labia<br><input type="checkbox"/> minor abrasion<br><input type="checkbox"/> other ..... |  |     |
| Assessment of perineal injury by a midwife:             |  |        |  | <input type="checkbox"/> small <input type="checkbox"/> avarage <input type="checkbox"/> big                                                                                                                                                                                                                                                                                                                  |  |     |
| <b>Blood loss</b>                                       |  |        |  | <input type="checkbox"/> < 350 ml <input checked="" type="checkbox"/> 400-500 ml <input type="checkbox"/> >500 ml                                                                                                                                                                                                                                                                                             |  |     |
| <b>Woman's attitude before labour</b>                   |  |        |  | <input type="checkbox"/> very positive <input type="checkbox"/> positive <input type="checkbox"/> neutral <input type="checkbox"/> negative <input type="checkbox"/> very negative                                                                                                                                                                                                                            |  |     |
